# Supplementary figures and images for: Matrix isolation FTIR and molecular orbital study of E and Z acetaldoxime monomersElectronic supplementary information (ESI) available: Internal coordinates for the Z and E isomers, calculated barriers for the rotation of methyl groups and the relative energies of the relevant stationary points for acetaldoxime. See http://www.rsc.org/suppdata/cp/b2/b203240f/
Source: Royal Society of Chemistry journal article supplement (doi:10.1039/b203240f), 2002-06-07

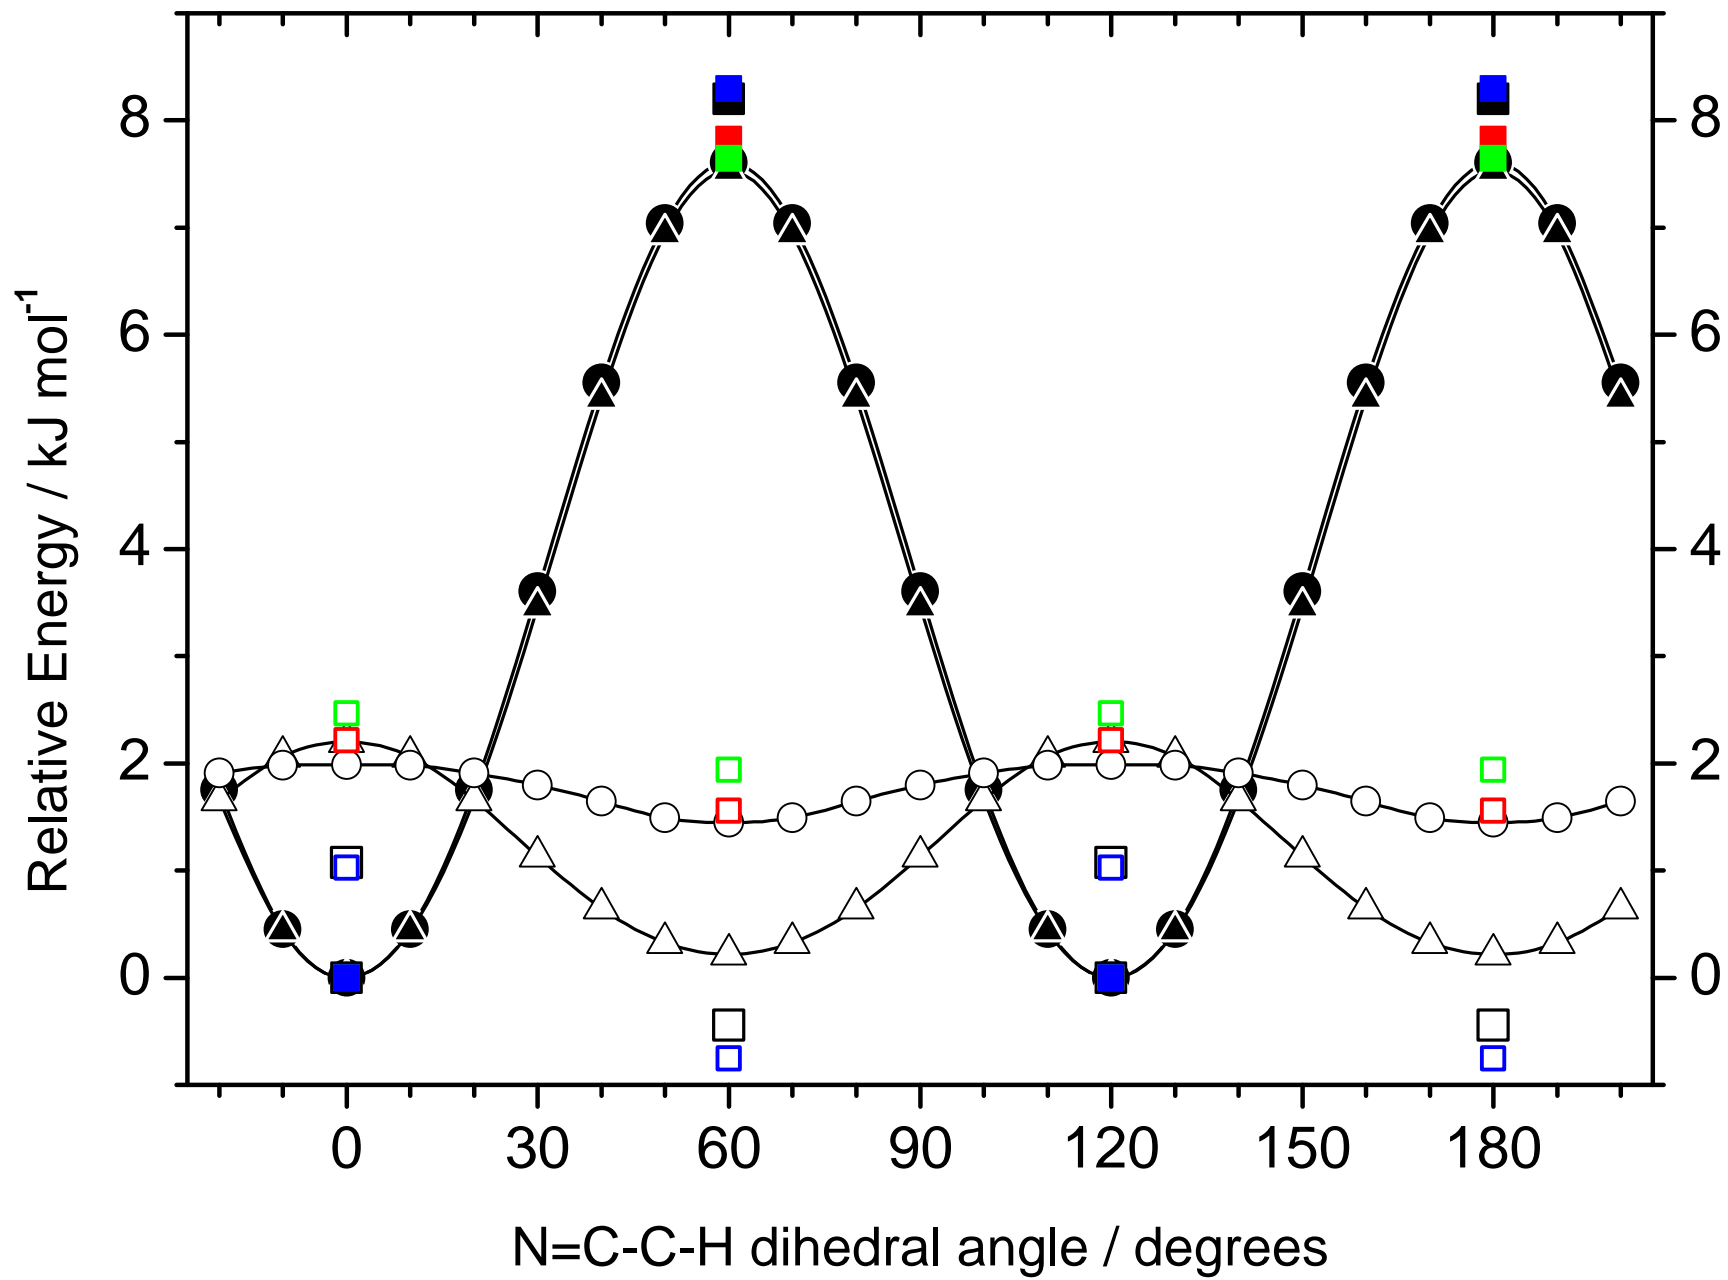

Supplement: figs2.pdf [file figs2.pdf]
